# Supplementary material for: New Insight Into the Cardioprotective Effects of Allium ursinum L. Extract Against Myocardial Ischemia-Reperfusion Injury
Source: PubMed Central journal article supplement (PMC8361798; doi:10.3389/fphys.2021.690696), 2021-07-30
Supplement: Table_1.pdf [file Table_1.pdf]

**SUPPLEMENTARY TABLE 1. Histological changes related to the degree of presence or absence of degenerative changes, dilated interstitium and hypercellularity of cardiomyocytes.**

| <b>Groups/Parameters</b> | <b>degenerative changes</b> | <b>dilated interstitium</b> | <b>hypercellularity</b> |
|--------------------------|-----------------------------|-----------------------------|-------------------------|
| <b>Sham</b>              | -                           | -                           | -                       |
| <b>I/R</b>               | +++                         | +                           | +++                     |
| <b>AUE125</b>            | ++                          | +                           | ++                      |
| <b>AUE250</b>            | ++                          | -                           | ++                      |
| <b>AUE500</b>            | +                           | -                           | +                       |
